# Supplementary material
Source: PubMed Central journal article supplement (PMC6698968)
Supplement: mmc1.pdf [file mmc1.pdf]

The American Journal of Human Genetics, Volume 105

## Supplemental Data

### ***De Novo* Missense Variants in *WDR37***

### **Cause a Severe Multisystemic Syndrome**

**Linda M. Reis, Elena A. Sorokina, Samuel Thompson, Sanaa Muheisen, Milen Velinov, Carlos Zamora, Arthur S. Aylsworth, and Elena V. Semina**

## **SUPPLEMENTAL NOTE: CASE REPORT**

**Individual 1** (Figure 1) is a 30-year-old White (Arabic/European descent) male. Karyotype and chromosomal microarray were normal. Clinical features below are from clinical exams and imaging.

*Ocular:* He had bilateral congenital glaucoma with optic nerve cupping requiring numerous surgeries, corneal opacity, microcornea (9 x 8mm OD and 6 x 7mm OS) and microphthalmia, and juvenile cataract. His right eye also had Peters anomaly (central corneal opacity and iridocorneal adhesions) and iris coloboma vs corectopia (keyhole pupil). His left eye had a totally opaque cornea with no view of the anterior chamber.

*Craniofacial:* He had significant microcephaly, arching eyebrows, thin upper lip, protruding upper and lower jaw with relative mid-face hypoplasia, large down-turned mouth, and simple and low set ears (Figure 1).

*Neurological:* He was non-verbal with very limited ambulation and seizures that began shortly after birth. Structural brain anomalies included Dandy-Walker variant (CSF collection in the posterior fossa which communicates with the fourth ventricle), mild enlargement of the ventricular system, delayed myelination and periventricular dysmyelination. Creatine Kinase (CK) level was normal at 17 years of age (130 with normal range of 0-200 U/L).

*Cardiovascular:* He had a ventricular septal defect, atrial septal defect, and patent ductus arteriosus.

*Genitourinary:* He had micropenis and cryptorchidism with incomplete puberty.

*Growth:* Length and weight were normal at birth at 21 inches (~53 cm; 75<sup>th</sup>-90<sup>th</sup> centile) and 8.5 pounds (3.9 kg; 50-75<sup>th</sup> centile), but by 1 year of age, his length and weight had fallen below the 3<sup>rd</sup> centile at 27 inches and 15 pounds 4 ounces (~69 cm and 6.9 kg, respectively). Growth hormone deficiency was diagnosed at 4 years of age and he was treated with growth hormone shots three times per week from 4 to 6 years of age with improved, but not normalized, growth trajectory. Treatment was discontinued at 6 years of age after a plateau in growth. At 14-15 years of age he went through abbreviated puberty with a growth spurt. At 17 years of age, his height, weight, and head circumference were all <3<sup>rd</sup> centile (128 cm, 30.2 kg, and 49 cm, respectively). Current adult height is just under 4 feet 6 inches (~136cm; <3<sup>rd</sup>; 50<sup>th</sup> centile for 9-year-old) and his weight fluctuates between 75-85 pounds (~34-38 kg; <3<sup>rd</sup>, 50<sup>th</sup> centile for 10 to 11-year-old). His head circumference was disproportionately small at 49.5 cm (50<sup>th</sup> centile for a 34-month-old) at 21 years of age.

*Skeletal/spinal/limb:* In addition to short stature, he had scoliosis, hip dysplasia with dislocation at 18 years of age; contractures of the interphalangeal and metacarpophalangeal joints, and pectus carinatum. He underwent bone lengthening procedures on both feet at 10 years of age to correct foot positioning.

*Gastrointestinal:* He had poor feeding from birth and progressive failure to thrive.

*Other:* Umbilical hernia.

*Prenatal history:* Fetal distress was noted prenatally, respiratory distress at birth.

**Individual 2** (Figure 1) is a White (European descent) female who died at age 22 months. Clinical features below are from clinical exams, clinical imaging, and autopsy.

*Ocular:* Cloudy corneas were seen in the newborn nursery (NBN). On autopsy, the right eye showed Peters anomaly, microcornea (6x6 mm), uveal coloboma extending from iris to optic disc, areas of retinal dysplasia, and optic nerve hypoplasia. The left eye had an adherent corneal leukoma, microcornea (8x6 mm), aphakia, tiny uveal coloboma extending from iris to optic disc, inner retinal hypoplasia with focal dysplasia, microphthalmia, and focal optic nerve hypoplasia.

*Craniofacial:* She had significant microcephaly, the appearance of hypertelorism with lateral eyelid eversion, epicanthal folds, broad nasal bridge, ear anomalies (prominent antihelices, bilateral absent superior crus, hypoplastic tragi), smooth philtrum and upper lip vermilion, micrognathia, nuchal webbing, and multisutural craniosynostosis with predominant right lambdoid synostosis associated with marked flattening of the right side of the occiput.

*Neurological:* She was non-verbal, non-ambulatory, and hypotonic with seizures that began shortly after birth. Structural brain anomalies included Dandy-Walker spectrum malformation (dilated fourth ventricle and cerebellar hypoplasia with loss of inferior vermis), corpus callosum dysgenesis, pericallosal lipoma, abnormal gyration, cortical dysplasia, polygyria, decreased myelination of white matter, enlargement of the midbrain tectum, hypoplastic pons, abnormal morphology of the basal ganglia, and absence of olfactory tracts and bulbs. Hippocampi were small and incompletely inverted.

*Brain MRI detailed review:* Sagittal noncontrast T1 image at age 5 days (Fig. 1S) shows a prominent massa intermedia (asterisk), large midbrain tectum (large white arrow), and small pons. Corpus callosum is hypoplastic (thin white arrow) with a small rostrum and splenium. There is a bright pericallosal lipoma

and a Dandy-Walker variant with vermian hypoplasia (white arrowhead) and dilation of the fourth ventricle which communicates with the posterior fossa. Axial noncontrast T1 (Fig. 1T) demonstrates an abnormal gyral pattern with shallow sulci and broad gyri. The basal ganglia have an abnormal configuration with lack of visualization of the anterior limb of the internal capsule. On the axial T2 image (Fig. 1U), abnormal diffuse white matter hyperintensity is present in keeping with decreased myelination. Note the abnormally bright appearance of the posterior limb of the internal capsule (large black arrow) which should be myelinated (i.e. T2-dark) in a term infant and dysplastic, thickened cortex in the sylvian fissures (black arrowheads). Axial T2 image centered at the orbits (Fig. 1V) shows left microphthalmia without an identifiable lens. The contour of the right globe is also dysmorphic. The hippocampi are small and incompletely inverted and appear prominent.

*Cardiovascular:* At post, she had cardiomegaly with mesocardia and right atrial dilation, right ventricular hypertrophy, persistent large patent ductus arteriosus, ostium secundum atrial septal defect, two ventricular septal defects (one infracristal membranous, one muscular), tricuspid valve thickening with marked hooding of all three leaflets, bicuspid pulmonic valve, and marked dilation of the main pulmonary artery and its left and right branches.

*Genitourinary:* She had bilateral renal dysplasia with multiple small cortical cysts, bilateral hydronephrosis and hydroureter, bifid right ureter, a severely hypoplastic uterus, and tan, fibrotic-appearing thin ovaries

*Growth:* Length and weight were assessed as appropriate for gestational age (AGA) at her birth hospital, but by 2 months of age, her length and weight had fallen below the 3<sup>rd</sup> centile to 51 cm and 2.5 kg. Prior to her death, her weight was measured at 7.45 kg (50<sup>th</sup> centile for a 6.5-month-old) with her final length measured at 70.5 cm (50<sup>th</sup> centile for a 9-month-old). Her head circumference was disproportionately small. By 2 months of age, her head circumference was well below the 3<sup>rd</sup> centile and at 22 months of age, her head circumference was 50<sup>th</sup> centile for a 3-month-old. Length, weight, and head circumference were 70.5 cm, 5.86 kg, 40.2 cm, respectively, at autopsy (approximately 4.5, 4.7, and 4.8 standard deviations below the mean for chronologic age).

*Skeletal/spinal/limb:* In addition to short stature, she had mild thoraco-lumbar scoliosis, a sacral dimple with tethered cord, minimal right 2-3 toe syndactyly with second toe overlapping the third, appearance of mildly tapered fingers, and a bridged right palmar crease. Length was noted to be difficult to measure due to contractures.

*Gastrointestinal:* NG tube used from infancy due to poor intake; G-tube was placed at 8 months of age.

*Other:* She also had a bilobed right lung, normally positioned single spleen, pancreatic lipomatosis, diastasis recti, and possible hearing loss with recurrent otitis media.

*Prenatal history:* Maternal parvovirus infection. First trimester screening showed increased nuchal translucency (4.3 mm) consistent with cystic hygroma. Anatomy scan (17 weeks) found a probable dilated right pulmonary artery, probable duplicated right collecting system, echogenic bowel, and single umbilical artery. Fetal echocardiogram (19 weeks) showed bilateral fetal superior vena cava. Oligohydramnios in later pregnancy. Respiratory distress at birth.

**Individual 3** (Figure 1) is an 8-year-old White (European descent) male. Chromosomal microarray identified a maternally-inherited deletion of 17p13.2 (4,327,373-4,541,334) of uncertain significance including the following OMIM genes: *SPNS3*, *SPNS2*, *MYBBP1A*, *GCT6*, *SMTNL2*, *ALOX15*, and *PELP1*. Clinical features below are from clinical exams and imaging. Karyotype and chromosomal microarray were normal.

*Ocular:* He had bilateral iris and chorioretinal colobomas extending to the optic disc with optic nerve dysplasia, horizontal nystagmus, and history of elevated intraocular pressure. Right eye also had retained pupillary membrane strands, retinal pigment contiguous dysplasia extending inferonasally to the peripheral chorioretinal coloboma, mild microcornea (10.5 mm), and anisometropic myopic astigmatism. Left eye also had Peters anomaly with central corneal leukoma, iris adhesions to the endothelium, and endothelial thinning, lens anterior capsule pigment plaque cataract extending into the cortex, and microcornea (9 mm)/microphthalmia (18.11 mm). Hypoplastic optic nerves were also noted on Brain MRI (described below).

*Craniofacial:* He had significant microcephaly, bitemporal narrowing, mild metopic prominence, small low-set and posteriorly rotated ears, square shaped ears, thin upper lip, thin and flattened mandible, high arched palate, short neck with excess nuchal skin posteriorly with webbing, epicanthal folds, upslanting palpebral fissures, ptosis, and a broad nasal bridge.

*Neurological:* He was non-verbal and non-ambulatory with seizures that began shortly after birth. Structural brain anomalies included Dandy-Walker variant (hypoplastic cerebellar hemispheres and inferior vermis with cystic dilatation of the fourth ventricle), hypoplastic corpus callosum with absence of the posterior cingulate gyrus, mild ventricular dilatation, delayed myelination, small sella, pituitary and infundibulum with absent posterior pituitary, hypoplastic optic nerves, optic tracts, and optic

chiasm. Gyration pattern was abnormal with broad gyri and shallow sulcations. Hippocampi were small and incompletely inverted.

*Brain MRI detailed review:* Sagittal noncontrast T1 image at age 11 days (Fig. 1W) shows that the corpus callosum is thinned but present (white arrows). Note enlarged massa intermedia, mildly prominent midbrain tectum, and a Dandy-Walker variant with hypoplastic cerebellar vermis. The optic chiasm and nerves appear atrophic (white arrowhead). The pituitary gland is small and the posterior pituitary bright spot is absent. Concurrent coronal T2 image (Fig. 1X) shows a simplified gyral pattern, diffuse white matter hyperintensity, and small and incompletely inverted hippocampi (black arrow). Follow-up sagittal noncontrast T1 at 11 months of life (Fig. 1Y) shows increased dilation of the posterior fossa and a relatively small brainstem. On the concurrent T2 image (Fig. 1Z) there is early myelination of the posterior limb of the internal capsule which appears dark (black arrowhead), significantly delayed for his age. Note extensive white matter volume loss with enlarged ventricles.

*Cardiovascular:* He had a persistent patent foramen ovale, patent ductus arteriosus, and prominent ventricular muscle bundle associated with tricuspid valve annulus.

*Genitourinary:* He had micropenis, cryptorchidism, and right hydronephrosis with recurrent urinary tract infections

*Growth:* At birth (39 3/7 weeks), his height, weight, and head circumference were all normal at 54.4 cm (90-95<sup>th</sup> centile), 3.582 kg (50<sup>th</sup> centile), and 35.5 cm (25<sup>th</sup>-50<sup>th</sup> centile). He had a normal human growth hormone level in infancy. His weight is normal with increasing centiles, but his height centile appears to be dropping with age. While accurate height is difficult to measure, from 3-6 years of age, his height measurements were generally between the 25-50<sup>th</sup> centile, while from 6-8 years of age, his height measurements were between the 3<sup>rd</sup>-25<sup>th</sup> centile. By 8 months of age, his head circumference had fallen below the 3<sup>rd</sup> centile. His head circumference was disproportionately small at 47.4 cm (50<sup>th</sup> centile for a 17-month-old) at 7.5 years of age.

*Skeletal/spinal/limb:* In addition to declining length centiles, he had hip dislocations and bilateral valgus deformities of the proximal femur, sacral dimple, hypoplastic proximal radii, bilateral 3-4 finger syndactyly, broad thumbs, clinodactyly, contractures of the 4<sup>th</sup> and 5<sup>th</sup> digits of the hand, bilateral sandal gap deformity, 2-4 toe syndactyly, and the appearance of a shortened metatarsal in the great toe.

*Gastrointestinal:* Malrotation with Ladd's bands obstructing the second part of the duodenum required surgical correction at 1 month of age (Ladd's procedure and inversion appendectomy). He also had a

feeding disorder with feeding intolerance and severe gastroesophageal reflux disease requiring g-tube and fundoplication at 2 months of age. He was noted to have a small stomach with large left lobe of the liver. Feeding intolerance continued and he remains entirely g-tube fed.

*Other:* Hearing loss with history of recurrent otitis media and four sets of PE tubes, mild hypothyroidism (familial), leg length discrepancy, and poor immune function with hypogammaglobulinemia (also present in mother and brother).

*Prenatal history:* Low fetal heart rate, breech presentation, very small and short umbilical cord and decreased amniotic fluid volume noted at delivery. Respiratory distress required admission to the Neonatal Intensive Care Unit shortly after birth.

**Individual 4** has limited information available as summarized in MyGene2 (<https://mygene2.org>); all other features are unknown.

*Ocular:* Coloboma

*Craniofacial:* Hypertelorism, long eyelashes, prominent forehead, downturned corners of the mouth, microcephaly, prominent nasal bridge, low-set ears.

*Neurological:* Global developmental delay, seizures, cerebellar hypoplasia.

*Cardiovascular:* Abnormal heart morphology.

*Genitourinary:* Not noted.

*Skeletal/spinal/limb:* Growth delay, single transverse palmar crease, tapered fingers, joint laxity.

*Gastrointestinal:* Not noted.

*Other:* Not noted.

*Prenatal history:* Not noted.

**A****Family 1***c.356C>T*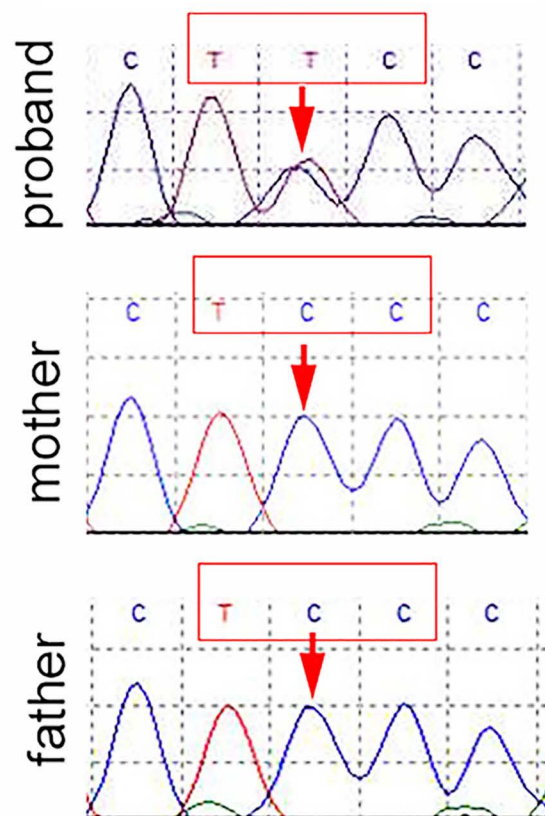**Family 2***c.389C>T*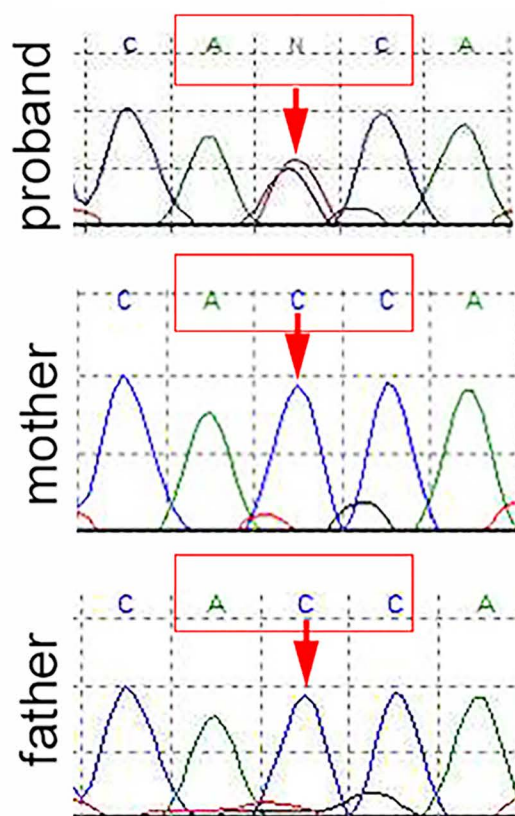**Family 3***c.374 C>T*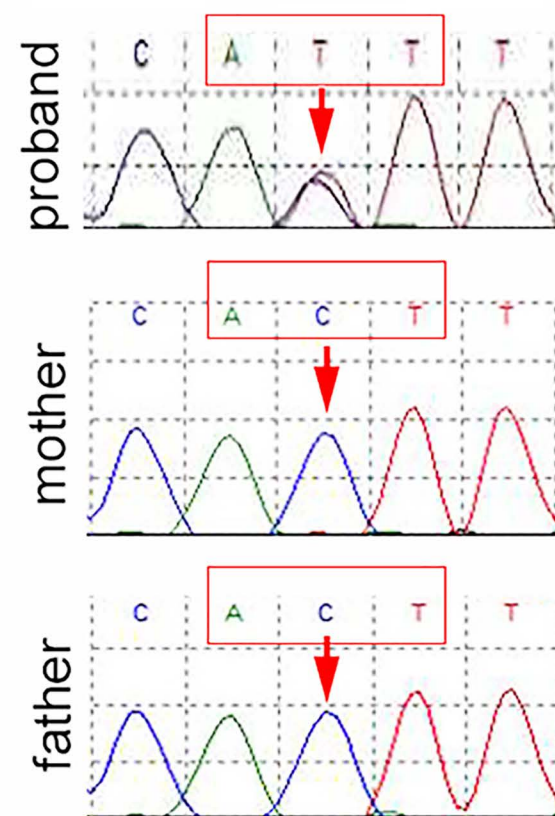**B**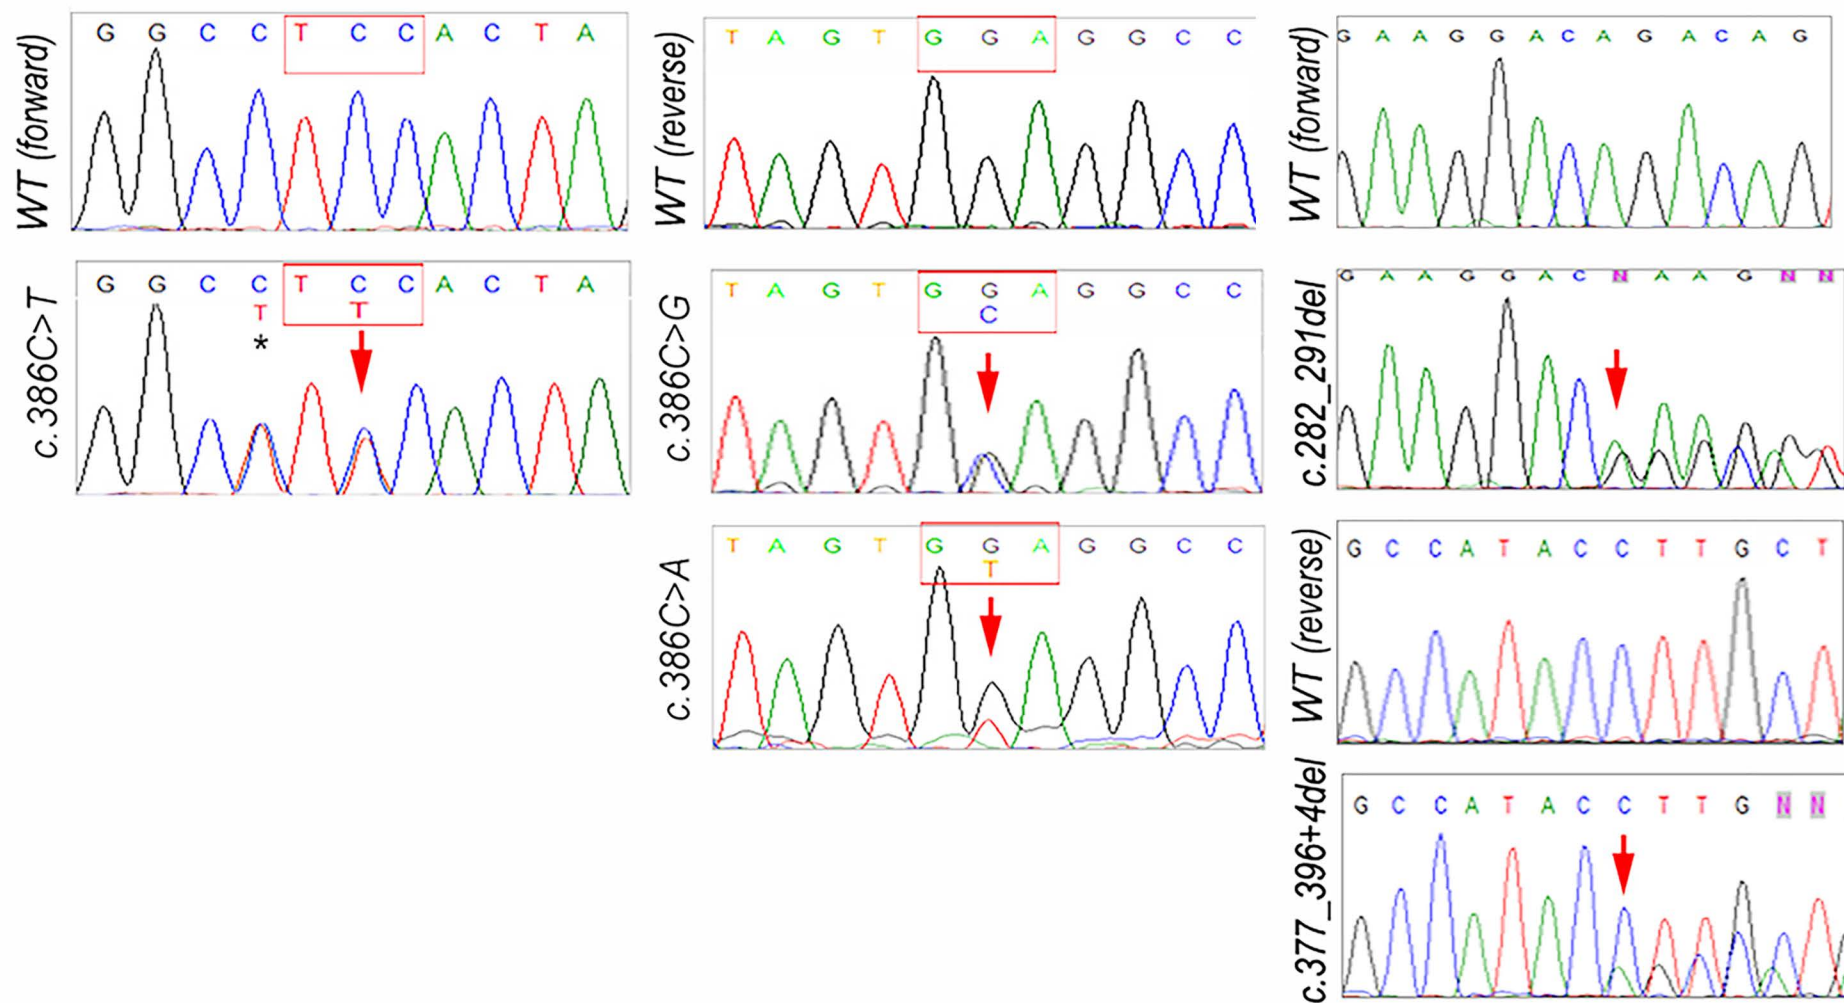



**Figure S1: Sequencing data for *WDR37/wdr37* variants. A.** *WDR37* sequencing data for Patients 1-3 and their parents. Sequence traces for each trio show heterozygous variant in the affected patient and normal sequence in parents. Red box indicates the affected codon. **B.** *wdr37* sequencing data for zebrafish mutants. Sequencing traces show genotyping results for each mutation (indicated with red arrow) with wild type region above. Forward sequences are shown for the c.386C>T and c.282\_291del variants; reverse sequences are provided for the c.386C>G, c.386C>A and c.377\_396+4del alleles. The \* marks a second silent variant in one of the lines, c.384C>T p.Ala128Ala.

1 92  
 Human MPTESASCSTARQTKQKRKSHSLSIRRTNSSEQERTGLPRDMLEGQDSKLPSSVRSTLLELFGQIEREFENLYIENLELRREIDTLNERLAA  
 Mouse MPTESGSCSTARQAKQKRKSHSLSIRRTNSSEQERTGLPREMLEGQDSKLPSSVRSTLLELFGQIEREFENLYIENLELRREIDTLNERLAG  
 Xenopus MPTESGSWAAARQTKQKRKSHSLSIKRTNSSEQDRPGLQREMLEGQDSKLPSSVRNTLLELFGQIEREFENLYLENLELRREIDTLNDR LAV  
 Zebrafish MPVESGNSAAARQVKQKRKSHSLSIRRTNSTEQDRTGMQORDMLEGQDSKLPALRSNLLDLFGQIEREFENLYIENLELRREIESLNERLSG

93 184  
 Human EGQAIDGAELSKGQLKTKASHSTSQLSQKLKTTYKASTSKIVS SFKTTTSRAACQLVKEYIGHRDGIWDVSVAKTQPVVLTASADHTALLW  
 Mouse EGQAIDGAELSKGQLKTKASHSTSQLSQKLKTTYKASTSKIVS SFKTTTSRAICQLVKEYIGHRDGIWDVSVTRTQPIVLTASADHTALLW  
 Xenopus EGQAIDGAELSKGQMKTKASHSTSQLSQKLKTTYKASTSKIVS SFKTTTSRAICQLVKDYVGHDRGLWDVSVTRTQPVVLTASADHTALLW  
 Zebrafish EGQTVEGGDL SKGALKTKASHSTSQLSQKLKTTYKASTSKIVS SFKATTSRAVCQLVKEYVGHDRGIWDLAVTRVQPLVLTASADHCSMLW

----- F ----- I ----- CI -----

185 274  
 Human SIETGKCLVKYAGHVGSVNSIKFHPSEQLALTASGDQTAHIWRYAVQLPTPQPVADTS--ISGEDEVESDKDEPDL DGDVSSDCPTIRVPL  
 Mouse SIETGKCLVKYAGHVGSVNSIKFHPSEQLALTASGDQTAHIWRYVVQLPTPQPVADTSQQIISGEDEIECSDKDEPIDIDGDVSSDCPTVRVPL  
 Xenopus SIETGKCLIKYVGHAGSVNSIKFHPTEQIALTASGDQTAHIWRYMVQLPTPQPTADTS--ISGEEVDFSDKDENDGDGDASSDCPTVRVPL  
 Zebrafish SIETGKCLLKYAGHAGSVNSIKFHPTEQMALTASGDQTAHIWRYMVQLPLPQPPADIS--ASLDDVDFSDKDEADGDADGPNCEPTIRVAT

275 366  
 Human TSLKSHQGVVIAADWLVGKQAVTASWDRTANLYDVETSELVHSLTGHDQELTHCCTHPTQRLVVTSSRD TTFRLWDFRDPSIHSVNVEQGH  
 Mouse TSLKSHQGVVIAADWLVGKQVVTASWDRTANLYDVETSELVHSLTGHDQELTHCCTHPTQRLVVTSSRD TTFRLWDFRDPSIHSVNVEQGH  
 Xenopus TALKSHQGVVIAADWLVGKQAVTASWDRTANLYDVETSELVHSLTGHDQELTHCCTHPTQRLVVTSSRD TTFRLWDFRDPSIHSVNVEQGH  
 Zebrafish TTLKSHQGVVIAADWLVGKQVVTASWDRAANLYDVETSELVHTLTGHDQELTHCCTHPTQRLVVTSSRD TTFRLWDFRDPSIHSVNVEQGH

367 458  
 Human TDTVTSAVFTVGDNVVSGSDDR TVKVWDLKNMRSPIATIRTD SAINRINVCVGQKIIALPHDNRQVRLFDMSGVRLARLPRSSRQGHRRMVC  
 Mouse TDTVTSAVFTVGDNVVSGSDDR TVKVWDLKNMRSPIATIRTD SAINRINVCVGQKIIALPHDNRQVRLFDMSGVRLARLPRSSRQGHRRMVC  
 Xenopus TDTVTSAVFTVGDNVVSGSDDR TVKVWDLKNMRSPIATIRTD SAINRISVSVGQR IIALPHDNRQVRLFDMSGVRLARLPRSNRQGHRRMVC  
 Zebrafish TDTVTSAVFTVGDNVVSGSDDR TVKVWDLKNMRSPIATIRTD SAVNRI SVSANQR IIALPHDNRQVRLFDMNGVRLARLPRSNRQGHRRMVC

459 494  
 Human CSAWSE DHPVCNLF TCGFDRQAI GWNINIPALLQEK  
 Mouse CSAWSE DHPICNLF TCGFDRQAI GWNINIPALLQEK  
 Xenopus CCAWSE DHPTCNLF TCGFDRQAI GWNINIPALLQEK  
 Zebrafish CSAWNEENQACNLF TCGFDRQAI GWNINIPALLQEK

**Figure S2: WDR37 full sequence alignment.** Full WDR37 sequence shown for human (NP\_054742.2), mouse (NP\_001034477.1), xenopus (NP\_001096465.1) and zebrafish (NP\_001161736.1). Residues conserved in three or more species are shaded in gray, human variants are indicated in red below, and WD domains are indicated as green boxes below.

**A**

Dataset: GeneAtlas MOE430, gcma

Probeset: 1434077\_at v

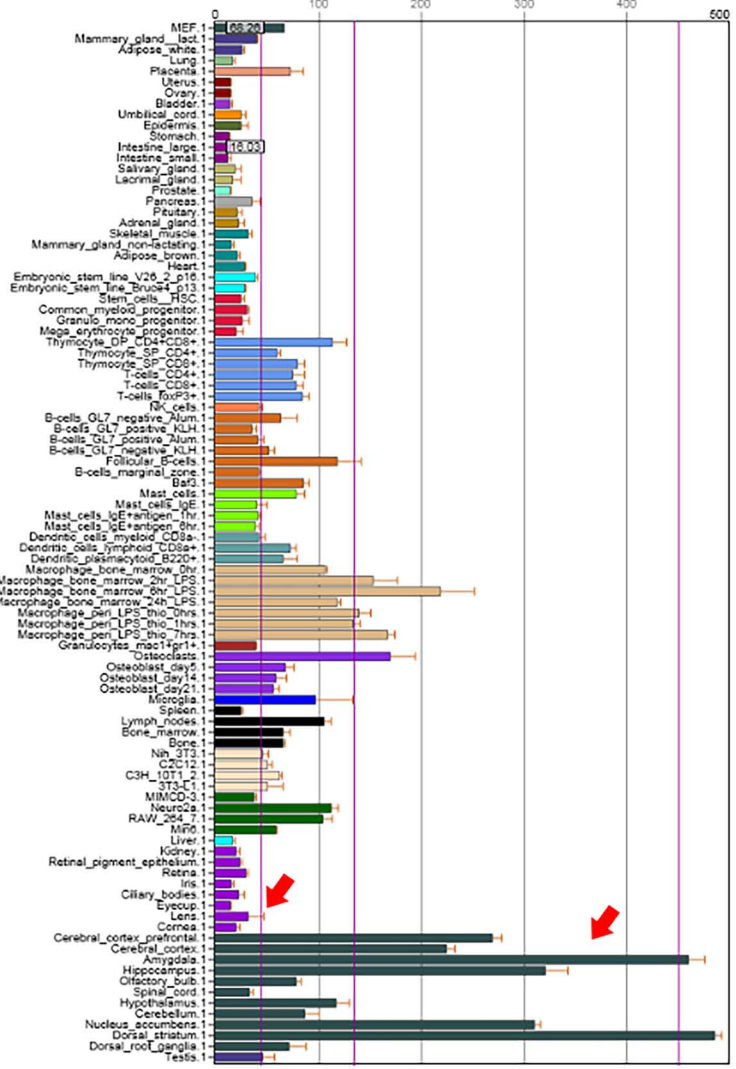

Dataset: GeneAtlas MOE430, gcma

Probeset: 1434076\_at v

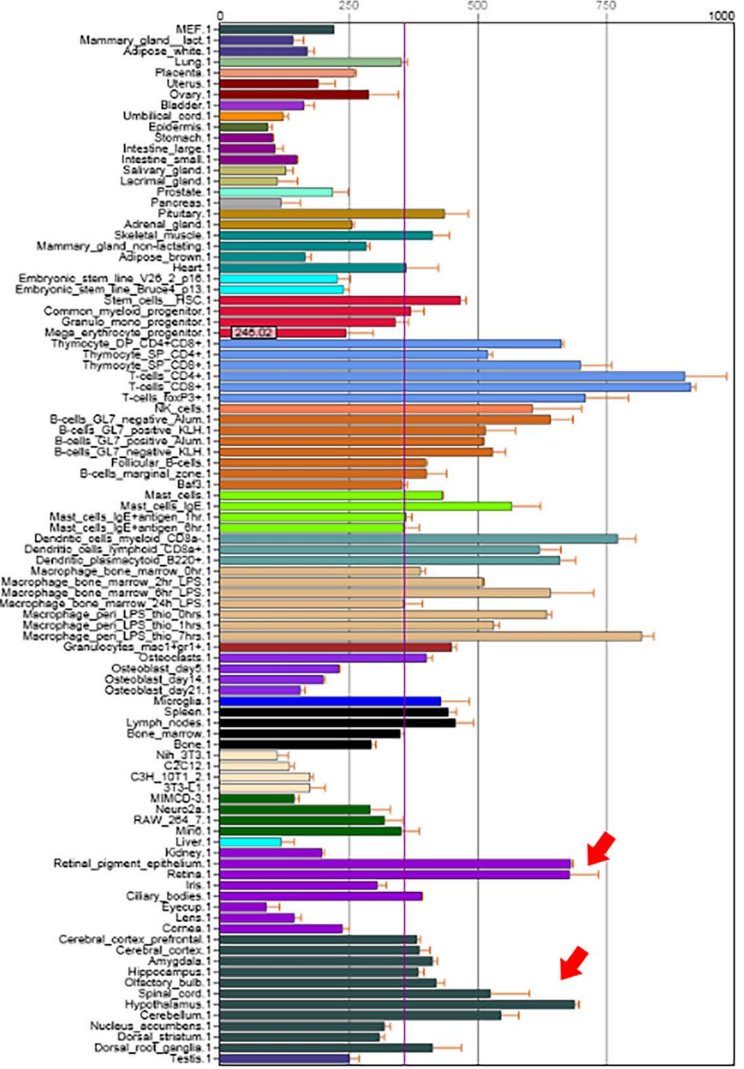**B**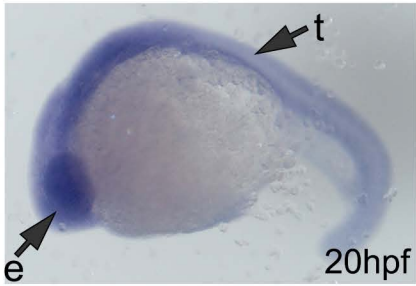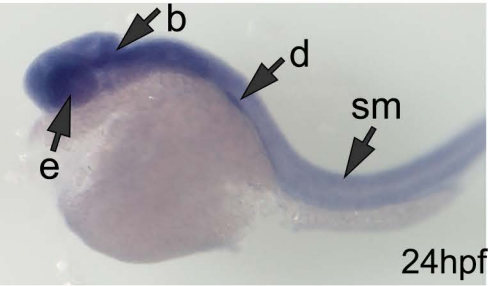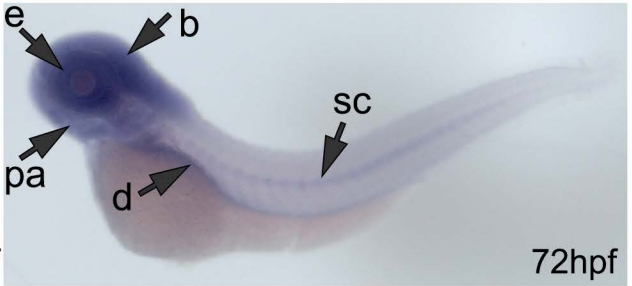

**Figure S3: Expression of *Wdr37/wdr37* in different species. A.** Relative expression of *Wdr37* in various mouse tissues. Review of expression data from BioGPS.org for *Wdr37* (Probesets 1434077 and 1434076). Red arrows indicate enriched eye and brain expression. **B.** *wdr37* expression in zebrafish embryos. Note broad expression of *wdr37* in zebrafish embryos at 20, 24 and 72 hours post fertilization (hpf); e- eye, b- brain, d- digestive system, pa- pharyngeal arches, sm- skeletal muscles, sc- spinal cord, t- trunk.

**A**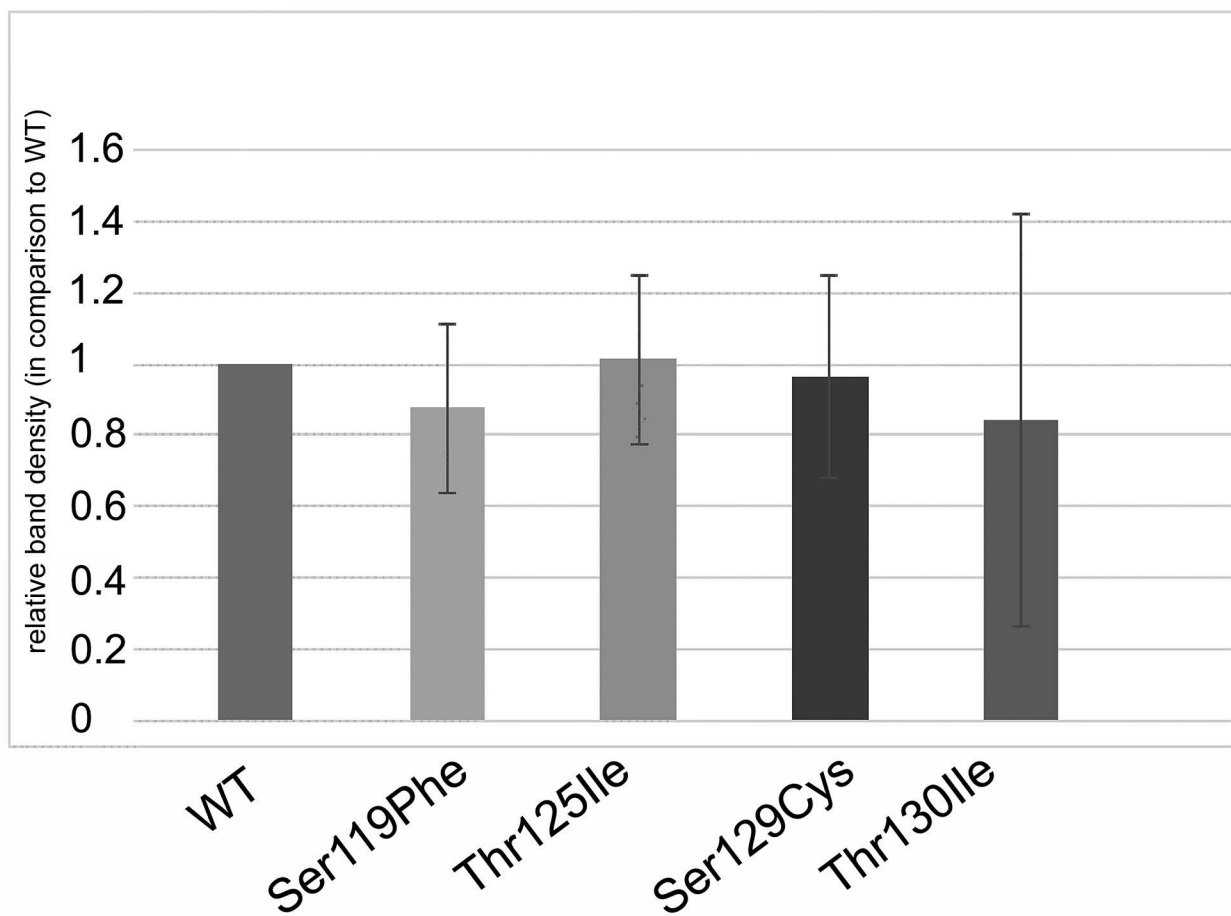**B**

2-dpf zebrafish embryos

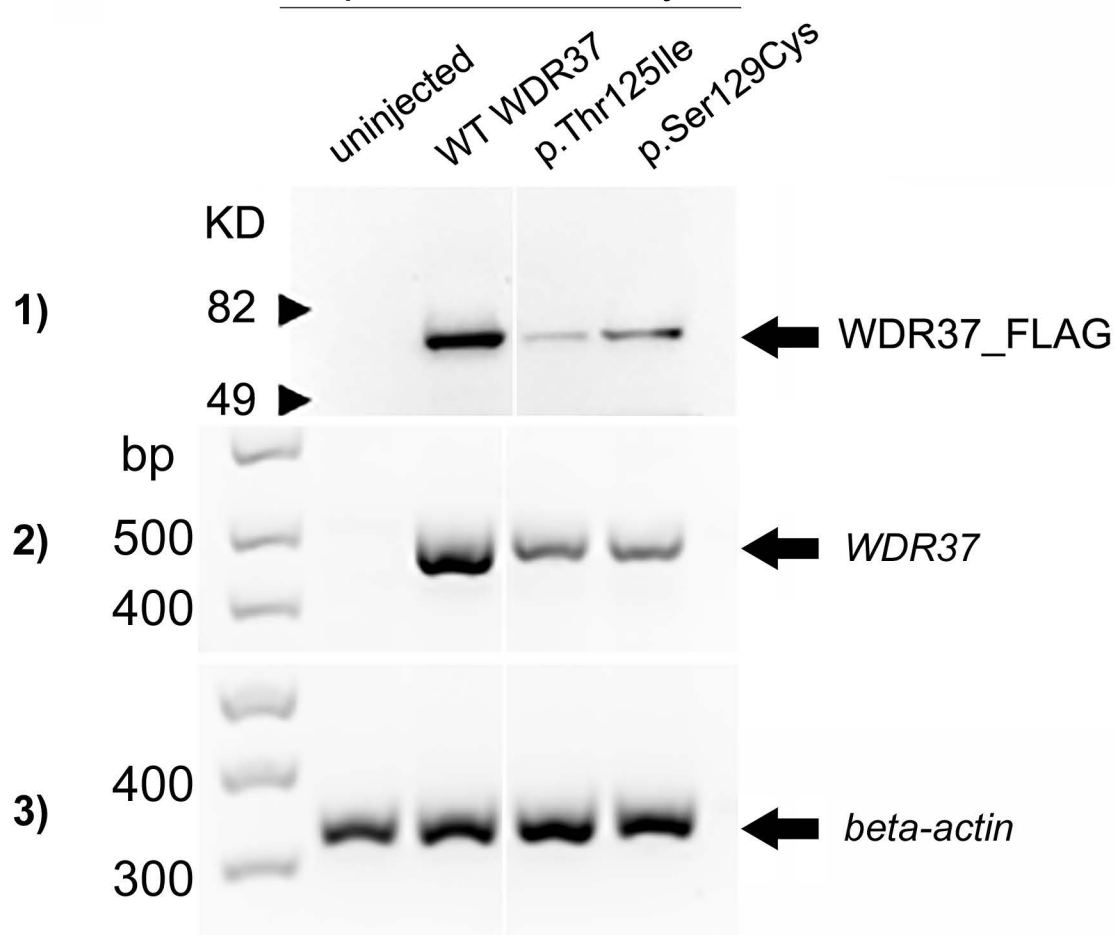

**Figure S4. Western blot and RT-PCR data.** **A.** Results of quantitative analysis of Western blot (n=4) data for WDR37 wild-type and variant proteins. No statistically significant difference was observed based on t-test (between each of the variants and wild-type). **B.** Western blot and RT-PCR data showing the presence of: 1) FLAG-tagged human WDR37 wild-type (WT) and mutant (p.Ser129Cys and p.Thr125Ile) and 2) human WT and mutant transcripts in 2-dpf embryos injected with mRNA encoding for the corresponding proteins but not in uninjected control embryos; 3) zebrafish *beta-actin* transcript in all samples.

**Table S1. Exome data coverage statistics for presented cases.**

| <b>Data/Sample</b>    | <b>Agilent Capture Kit</b> | <b>Total yield (bp)</b> | <b>Average read length (bp)</b> | <b>Initial mappable reads (mapped to human genome)</b> | <b>% Initial mappable reads (out of total reads)</b> | <b>Non-redundant reads (de-duplicated by Picard tools)</b> | <b>% Non-redundant reads (out of initial mappable reads)</b> | <b>% Coverage of target regions (more than 10X)</b> | <b>Mean depth of target regions (X)</b> |
|-----------------------|----------------------------|-------------------------|---------------------------------|--------------------------------------------------------|------------------------------------------------------|------------------------------------------------------------|--------------------------------------------------------------|-----------------------------------------------------|-----------------------------------------|
| Individual 1          | SureSelect_V4              | 3768468166              | 101                             | 37182092                                               | 99.7                                                 | 36342818                                                   | 97.7                                                         | 94.9                                                | 49.4                                    |
| Mother (Individual 1) | SureSelect_V4              | 3255337060              | 101                             | 32130068                                               | 99.7                                                 | 31031546                                                   | 96.6                                                         | 94.5                                                | 43.6                                    |
| Father (Individual 1) | SureSelect_V4              | 3335517324              | 101                             | 32914712                                               | 99.7                                                 | 31871923                                                   | 96.8                                                         | 94.5                                                | 44.6                                    |
| Individual 2          | SureSelect_V4              | 4069822068              | 101                             | 40108676                                               | 99.5                                                 | 39001530                                                   | 97.2                                                         | 96.2                                                | 53.8                                    |



**Table S1. Exome data coverage statistics for presented cases.** Statistical data for Individual 1 (and parents) and Individual 2 is summarized.

**Table S2. Variants of uncertain significance in *WDR37***

| <b>Individual</b> | <b>Phenotype</b>                                                                  | <b>DNA change</b> | <b>Protein change</b> | <b>gnomAD frequency</b> | <b>In silico predictions</b>        | <b>Family analysis</b>                   |
|-------------------|-----------------------------------------------------------------------------------|-------------------|-----------------------|-------------------------|-------------------------------------|------------------------------------------|
| Individual 1      | See manuscript                                                                    | c.1255G>A         | p.Gly419Ser           | 13/277096               | Damaging by 2/5 (MT, F)             | Inherited from an unaffected parent      |
| Individual 5      | Unilateral cataract with iridolenticular adhesions, heart defect, MRSA meningitis | c.770C>A          | p.Pro257His           | 1/250886                | Damaging by 2/5 (MT, F)             | Inherited from an unaffected parent      |
| Individual 6      | Glaucoma and iris hypoplasia                                                      | c.1330C>T         | p.Arg444Trp           | 1/251398                | Damaging by 5/5 (S, PP2, MT, MA, F) | Not present in 5 affected family members |

S: SIFT, PP2: PolyPhen2, MT: MutationTaster, MA: MutationAssessor, and F: FATHMM MKL

**Table S2. Variants of uncertain significance in *WDR37*.** Additional rare variants in *WDR37* and their features are presented. Based upon testing of family members, general population data, and in silico predictions, all are considered likely benign.

**Table S3. Summary of 145 significantly changed transcripts.** Zebrafish gene ID, transcript ID, ZFIN number and gene symbol, the gene name and OMIM# of an identified human ortholog, when available, along with the fold change and raw p-value are presented (sorted in order from most downregulated to most upregulated).

## SUPPLEMENTAL MATERIALS AND METHODS

### ***Human sequencing***

This human study was approved by the Institutional Review Board of the Children's Hospital of Wisconsin with written informed consent obtained for participation and publication for every participant. Genomic DNA from Individual 1 and his parents and Individual 2 was submitted for exome sequencing as previously reported to Axseq (now MacroGen)<sup>1</sup>; prior analysis excluded pathogenic variants in *B3GLCT* and other known ocular genes<sup>2</sup>. Trio analysis was performed using SNP and Variation Suite (Golden Helix) and variants of interest were annotated using gnomAD and dbNSFP tracks for frequency in the general population and in silico predictions (SIFT, Polyphen2, MutationTaster, MutationAssessor, and FATHMM MKL), respectively. Individuals 3 and 4 were identified through the matchmaker website MyGene2<sup>3</sup> and Individual 3 was subsequently enrolled in the study. Sanger sequencing of *WDR37* exon 5 was undertaken in Individuals 1-3 and all parents to confirm the variants of interest and determine co-segregation using the following primers: TCCTGTGCAAGACACAAGAC (F) and TACAAGCATGAGCCACCATG (R).

### ***Growth data graphing***

Height centiles for Individuals 1 and 3 at each time point were determined using the CDC Growth Calculator for 0 to 36 months or 2 to 20 years, as appropriate, at <https://peditools.org>. Centiles were graphed by age (years) using Excel for Individuals 1 and 3 only since a specific birth length measurement was not available for Individual 2.

### ***Analysis of IMPC mouse data***

Phenotypes for *Wdr37*<sup>tm1a(KOMP)Wtsi</sup> mice were obtained from the International Mouse Phenotyping Consortium (IMPC) website, <http://www.mousephenotype.org/data/genes/MGI:1920393#section-associations>. We performed a Chi-square goodness-of-fit test comparing the IMPC reported numbers of wild-type, heterozygous, and homozygous pups with the *Wdr37*<sup>tm1a(KOMP)Wtsi</sup> allele to expected mendelian ratios for a compound heterozygous cross. Data for the numbers of pups was obtained at: [http://www.mousephenotype.org/data/charts?accession=MGI:1920393&allele\\_accession\\_id=MGI:4452651&zygosity=homozygote&parameter\\_stable\\_id=IMPC\\_VIA\\_001\\_001&pipeline\\_stable\\_id=MGP\\_001](http://www.mousephenotype.org/data/charts?accession=MGI:1920393&allele_accession_id=MGI:4452651&zygosity=homozygote&parameter_stable_id=IMPC_VIA_001_001&pipeline_stable_id=MGP_001).

### ***Protein alignments and modeling.***

In silico analysis of wild-type and mutant WDR37 was undertaken. Modeling of the WDR37 wild-type (NP\_054742.2) and mutant structures was completed using I-TASSER<sup>4</sup> (<https://zhanglab.ccmb.med.umich.edu>). The top model for each sequence was selected; for the wild-type protein, the top structural analog used for modeling was RCSB Protein Data Bank assembly 5o9zl, a pre-catalytic human spliceosome primed for activation (<https://www.rcsb.org/structure/5o9z>). The top models were uploaded into PyMOL Molecular Graphics System, Version 2.2 (Schrödinger, LLC; <https://pymol.org/2/>) for labelling of specific amino acids and coloring of domains.

### ***Site-directed mutagenesis.***

The plasmid pEZ-M14 encoding full-length human WDR37 in fusion with 3xFLAG tag (GeneCopoeia, EX-A3878-M14) served as a template for site-directed mutagenesis. The QuikChange XL Site-Directed Mutagenesis Kit (Agilent Technologies) was used to introduce 4 different variants into this gene. The following mutagenesis primers were utilized: for the c.356C>T variant 5'-cttcagtttctggaagagctggctggtgctg and 5'-cagcaccagccagctcttccagaaactgaag; for the c.374C>T variant 5'-tggtggaagccttgtaaagtgtcttctcagtttctgg and 5'-cagaaactgaagaccatttacaaggcttccacca; for the c.386C>G variant 5'-aatcttgctggtgcaagccttgtaagtgtcttc and 5'-gaagaccacttacaaggcttgcaccagcaagatt; and for the c.389C>T variant 5'-tggagacaatcttgctgatggaagccttgtaagtg and 5'-cacttacaaggcttccatcagcaagattgtctcca. Primers were designed using the QuikChange Primer Design Program (Agilent Technologies). All variants were verified by Sanger sequencing.

### ***Cell culture and transfection.***

The B3 human lens epithelial cell line (ATCC<sup>®</sup> CRL-11421<sup>™</sup>) was maintained in Eagle's Minimum Essential Medium supplemented with 20% fetal bovine serum. Approximately 10<sup>7</sup> cells were transfected with 7.5µg of DNA encoding WDR37 variants and Lipofectamine 2000 reagent (Invitrogen). Experiments were performed with wild-type *WDR37* and mutant constructs with each of the identified human variants: WDR37\_S119F (p.Ser119Phe), WDR37\_T125I (p.Thr125Ile), WDR37\_S129C (p.Ser129Cys), and WDR37\_T130I (p.Thr130Ile). On the day following transfection, cells were transferred to 2 plates and after an additional 24 hours either used for immunofluorescence or harvested for Western blot analysis.

### ***Immunofluorescence staining***

24 hours post-transfection cells were sub-cultured into a 35mm glass bottom dish (Cellvis). After an additional 24 hours, cells were rinsed with PBS (Phosphate Buffered Saline) buffer and fixed with 4%

paraformaldehyde in PBS for 15 minutes at room temperature, permeabilized with 0.25% TritonX-100 and blocked with 3% normal donkey serum in PBS. Plates were incubated with 1:500 dilution of anti-FLAG M2 mouse monoclonal antibody (Cell Signaling Technology) in 3% normal donkey serum overnight followed by donkey anti-mouse IgG secondary antibody conjugated with AlexaFluor<sup>tm</sup> 568 (Invitrogen). All washes between these steps were done with 1xPBS. Cells were overlaid with DAPI-containing Fluoromount-G (eBioscience) mounting media and imaged with All-in-One Fluorescence Microscope (Keyence).

### ***Protein extraction and Western blot***

Transfected cells were fractionated with the Nuclear Extraction Kit (Millipore Sigma) which sequentially extracts cytoplasmic and nuclear proteins by incubation with hypotonic buffer followed by centrifugation and extraction of the remaining crude nuclear pellet with a high-salt buffer according to the manufacturer's protocol. 22  $\mu$ l out of the total 500  $\mu$ l of each cytoplasmic fraction and 15  $\mu$ l out of the total 45  $\mu$ l of each nuclear fraction were loaded for every transfected variant and control untransfected cells onto an 18-well 4-15% Criterion Precast Gel (Bio-Rad). Resolved proteins were transferred into Immobilon-P transfer membrane (Millipore) and probed with anti-FLAG M2 mouse monoclonal antibody (Sigma) as a primary antibody and goat-anti mouse IgG1 as a secondary antibody, HRP conjugate (Invitrogen). The control  $\beta$ -Actin Antibody (Santa Cruz Biotechnology, sc-81178) in dilution 1:500 was used as a cytoplasmic fraction marker. After exposure to the SuperSignal West Pico chemiluminescent substrate ESL reagent (Thermo Scientific) the signal was detected with the iBrightFL1000 imager (Invitrogen). Quantification of Western blot (n=4) results was performed using ImageJ (<https://imagej.nih.gov/ij/>) and relative (to WT) band density was calculated for each mutant; the t-test was used to compare the mean value for each WDR37 variant to wild-type.

### ***Analysis in zebrafish***

To further explore the role of wild-type and mutant *WDR37/wdr37*, additional experiments were designed and carried out in zebrafish. All zebrafish experiments were approved by the Medical College of Wisconsin Institutional Animal Care and Use Committee (IACUC).

### ***In situ hybridization***

in situ hybridization was performed using an antisense *wdr37* probe generated as follows: a 747-bp fragment specific for the zebrafish *wdr37* transcript was first generated using the following primers, 5'-

CGGTCTGTCAGGAGAAGGAC and 5'-AGACGCTGAGTCGGATGAGT and inserted into a pCRII-TOPO vector. This construct was extracted, purified and precipitated after being linearized with EcoRV and the antisense probe was generated using DIG RNA Labeling mix (Roche Diagnostics) and SP6 RNA polymerase (Roche Diagnostics). The probe was precipitated then purified using Micro Bio-Spin Columns (Bio-Rad). In situ hybridization was then performed with this probe following previously described protocols<sup>5</sup>.

### ***mRNA synthesis and injection***

Capped and polyadenylated human *WDR37* mRNA was synthesized using mMESSAGING MACHINER<sup>®</sup> T7 Ultra Kit (Ambion) according to the manufacturer protocol. The Ringer solution containing 300ng of mRNA encoding WT or either one of the c.386C>G and c.374C>T *WDR37* mutants was injected into single cell embryos (n=50-100) using the NanojectII injector (Drummond Scientific). In order to verify human *WDR37*/*WDR37* expression, equal numbers of injected or noninjected embryos were collected at 2 dpf for RT-PCR (n=5 for each group) and Western Blot analysis (n=20 for each group). The RNA was extracted using Direct-zol RNA MiniPrep kit (Zymo Research). The cDNA was synthesized with SuperScript First-Strand Synthesis System for RT-PCR (Invitrogen) and amplified with either human-specific primers for the *WDR37* transcript (5'- GAGAGGACGGGACTGCCA and 5'- GGCCTGCGTACTTGACTAGG; product size is 493bp) or primers for the zebrafish *beta-actin* transcript (5'- GAGAAGATCTGGCATCACAC and 5'- ATCAGGTAGTCTGTCAGGTC; product size is 323bp). Embryos collected for protein studies were deyolked in 1/2 Ginzburg Fish Ringer buffer and homogenized in 60µl of RIPA buffer in the presence of protease inhibitor cocktail (Sigma). Recombinant protein expression was verified by Western Blot as described above. The membrane was probed with mouse monoclonal anti-FLAG M2 antibody (Sigma). After incubation with HRP-conjugated secondary antibody the signal was detected with SuperSignal West Pico Chemiluminescent Substrate (Thermo Scientific).

### ***Producing of mutant zebrafish lines and fish observations***

The pCMV-BE-zCas9 vector (Addgene, Plasmid #101739) was used to synthesize the modified version of Cas9<sup>6</sup>. The vector was linearized with BamHI and mRNA was produced using the mMESSAGING MACHINER<sup>®</sup> T7 Ultra Kit (Ambion). To create precise base conversions in zebrafish *wdr37*, gRNA (5'- GGCCTCCACTAGCAAGGTA) targeting the enzyme to this sequence in *wdr37* exon5 was designed. The DNA fragment encoding gRNA was cloned into the BsaI site of the DR274 vector (Addgene, Plasmid #42250)<sup>7</sup>. The vector was linearized by a DraI restriction enzyme and gRNA was expressed using the



MEGAscript T7 Transcription Kit (Thermo Fisher Scientific) following the manufacturer's protocol. Guide RNA was purified with the RNA Clean&Concentrator<sup>tm</sup>-5 kit (Zymo Research).

Approximately 9 nl of the mixture containing 600pg of BEcas9 mRNA and 25pg of gRNA in Ringer buffer was injected into each single-cell stage zebrafish embryo using the NanojectII injector (Drummond Scientific). The F1 embryos produced by mosaic breeders were genotyped individually and 3 pairs of founder adult fish (F0) with 3 different substitutions of c.386C were identified: c.386C>T p.Ser129Phe, c. 386C>A p.Ser129Tyr, and c.386C>G p.Ser129Cys. The c.386C>T p.Ser129Phe fish also carried a second, silent variant, c.384C>T p.Ala128Ala. For genotyping, DNA was first amplified with primers flanking the target site: 5'- aacagaatgcatatattgtgtttcc and 5'- tctacttgtaagctgcaaattctc and then the resulting DNA fragment was either sequenced or digested with the BsaXI restriction enzyme (NEB).

The same modified CRISPR-Cas9 system was also used to generate zebrafish with a 24 base pair deletion, c.377\_396+4del, across the *wdr37* exon5/intron5 junction. Another line harboring a c.484\_491del variant was produced with conventional *S. pyogenes* Cas9 endonuclease and gRNA (5'- GGAGAAGGACAGACAGTCGA) targeting *wdr37* exon4. Genotyping was done by amplification of the DNA fragment containing the targeted site with 5'- ccaaagacttgctctgcatt and 5'- tcagccctattcactcgaca primers and restriction digestion with the AhdI enzyme (NEB).

Zebrafish produced by mosaic founders were collected at different stages (5-7 dpf, 9-14 dpf, 17-19 dpf, 1 month, 2-3 months), observed for phenotypes and genotyped for the alleles described above. The percent of heterozygous animals for each allele at different ages (5-7- dpf, 9-14-dpf, 17-19-dpf, and over 1 month (30+ dpf)) was identified and statistical significance was calculated using a Chi-square 2x2 contingency table test to compare each group of fish.

Zebrafish were observed and imaged using a Zeiss Discovery V12 microscope. Embryos were maintained in petri dishes in standard medium in an incubator at 28.5°C up to 5-6 dpf. Then the embryos were placed onto a recirculating aquatic system (Aquatic Habitats) to grow into adults; zebrafish larvae were collected at the stages indicated above for observations and genotyping. Total body length (from the tip of the maxilla to the tip of the tail) and head size (from the tip of the maxilla to the center of the otic vesicle) measurements were taken using lateral fish images and the resultant data were used to calculate mean and standard deviation values for wild-type and each mutant; the head size measurement was divided by body length to calculate a head-to-body ratio. Statistical significance for all comparisons was determined using a t-test.

### ***RNA extraction and RNA-seq***

Five-day-old zebrafish embryos from a cross of two mosaic F0 parents were anesthetized with tricaine methanesulfonate (Sigma) in Ringer buffer. Tails were removed for genotyping, and each embryo was placed in an individual tube and lysed in TRI reagent (Zymo Research). DNA from the tails was extracted by alkaline lysis<sup>8</sup> by incubation in 50mM NaOH at 95°C for 15 minutes with subsequent neutralization with 1/10 of the volume of 1M Tris HCl, pH 8.0. Genotyping was performed as described above and embryos heterozygous for the c.386C>T p.Ser129Phe variant or wild-type at this site were identified. Three independent RNA samples were prepared with each sample containing RNA from five individual embryos pooled together using Direct-zol™ RNA MiniPrep kit (Zymo Research). RNA from mutant and wild-type embryos was submitted to MacroGen for sequencing. All sequenced samples were assessed for quality and had an RNA Integrity Number (RIN) greater than 7.0. Whole transcriptome sequencing on 6 paired-ends samples was performed utilizing TruSeq RNA Sample Prep Kit v2 on the Illumina HiSeq X Ten platform. Reads obtained from RNA sequencing were mapped to the Danio rerio reference genome GRCz11. Bioinformatic analysis performed by MacroGen included FastQC v0.11.7 to perform quality check on the raw sequences, Trimmomatic 0.38 for trimming of the sequences, HISAT2 version 2.1.0, Bowtie2 2.3.4.1 for mapping next-generation sequencing reads to genomes, and StringTie version 1.3.4d to assemble RNA-Seq alignments. DEG (Differentially Expressed Genes) analysis was performed to compare the mutant and wild-type transcriptome using DESeq2. The averaged FPKM (Fragments Per Kilobase of transcript per Million mapped reads) values ratio were analyzed for transcripts which had changed at least 2 folds in either direction. The results showed 145 genes which satisfied  $|fc| \geq 2$  &  $nbinomWaldTest$  raw p-value < 0.05 conditions in comparison pair. No secondary validation of the identified differentially expressed transcripts was performed. Predicted activity of the pathways based on the fold changes of the averaged FPKM was determined by Ingenuity Pathway Analysis (IPA) (QIAGEN). Full RNAseq data are available in the ArrayExpress database at EMBL-EBI ([www.ebi.ac.uk/arrayexpress](http://www.ebi.ac.uk/arrayexpress); Accession number E-MTAB-8029).

### ***References***

1. Weh, E., Reis, L.M., Happ, H.C., Levin, A.V., Wheeler, P.G., David, K.L., Carney, E., Angle, B., Hauser, N., and Semina, E.V. (2014). Whole exome sequence analysis of Peters anomaly. *Human genetics* 133, 1497-1511.
2. Weh, E., Reis, L.M., Tyler, R.C., Bick, D., Rhead, W.J., Wallace, S., McGregor, T.L., Dills, S.K., Chao, M.C., Murray, J.C., et al. (2014). Novel B3GALTL mutations in classic Peters plus syndrome and lack of mutations in a large cohort of patients with similar phenotypes. *Clinical genetics* 86, 142-148.

3. MyGene2. NHGRI/NHLBI University of Washington-Center for Mendelian Genomics (UW-CMG). In. (Seattle, WA
4. Yang, J., Yan, R., Roy, A., Xu, D., Poisson, J., and Zhang, Y. (2015). The I-TASSER Suite: protein structure and function prediction. *Nat Methods* 12, 7-8.
5. Sorokina, E.A., Muheisen, S., Mlodik, N., and Semina, E.V. (2011). MIP/Aquaporin 0 represents a direct transcriptional target of PITX3 in the developing lens. *PLoS One* 6, e21122.
6. Zhang, Y., Qin, W., Lu, X., Xu, J., Huang, H., Bai, H., Li, S., and Lin, S. (2017). Programmable base editing of zebrafish genome using a modified CRISPR-Cas9 system. *Nat Commun* 8, 118.
7. Hwang, W.Y., Fu, Y., Reyon, D., Maeder, M.L., Tsai, S.Q., Sander, J.D., Peterson, R.T., Yeh, J.R., and Joung, J.K. (2013). Efficient genome editing in zebrafish using a CRISPR-Cas system. *Nat Biotechnol* 31, 227-229.
8. Meeker, N.D., Hutchinson, S.A., Ho, L., and Trede, N.S. (2007). Method for isolation of PCR-ready genomic DNA from zebrafish tissues. *Biotechniques* 43, 610, 612, 614.
